# Supplementary material
Source: PubMed Central journal article supplement (PMC4444073)
Supplement: NIHMS690972-supplement-1.pdf [file NIHMS690972-supplement-1.pdf]

## Supplementary Materials

### Longitudinal Association Mapping Models Using Di-allelic Markers

Assume that  $I$  di-allelic markers  $M_j, j = 1, 2, \dots, I$  are typed in a region of the trait locus  $Q$ . For marker  $M_j$ , the two alleles are denoted by  $M_j$  and  $m_j$  with frequencies  $P_{M_j}$  and  $P_{m_j}$ , respectively (note here the notation  $M_j$  can be either marker or allele, whichever applies). Suppose that markers  $M_j$  are in Hardy-Weinberg equilibrium (HWE). However, they may be in LD. Denote the measure of LD between trait locus  $Q$  and marker  $M_j$  by  $D_{M_jQ} = P(M_jQ_1) - q_1P_{M_j}$ , and the measure of LD between marker  $M_j$  and marker  $M_k$  by  $D_{M_jM_k} = P(M_jM_k) - P_{M_j}P_{M_k}, j, k = 1, 2, \dots, I$  [Hartl and Clark, 1989; Hedrick, 1987; Lewontin, 1988]. Here  $P(M_jQ_1)$  and  $P(M_jM_k)$  are frequencies of haplotypes  $M_jQ_1$  and  $M_jM_k$ , respectively.

Consider a population sample with  $N$  individuals. For the  $i$ -th individual, let  $y_i$  be his/her quantitative trait value and let  $G_{ij}$  be his/her genotype at the marker  $M_j$ . A temporal LD regression mixed model extending (2) in the main text at the time  $t$  can be defined as

$$y_i(t) = \mu(t) + w_i(t)^\tau \beta(t) + \sum_{j=1}^I x_{ij} \alpha_j(t) + \sum_{j=1}^I z_{ij} \delta_j(t) + U_i(t) + E_i + \epsilon_i. \quad (\text{S.1})$$

The components of the above model are specified as follows. First,  $\mu(t)$  is a non-random overall mean at time  $t$  and  $\mu(t)$  is unspecified;  $w_i(t)$  is a row vector of covariates such as gender, BMI at the time  $t$ , and possible their interaction terms;  $\beta(t)$  is a non-random column vector of regression parameters of the covariates  $w_i(t)$  with fixed effects. One may want to notice that the covariates can be time invariant like gender or can be time varying such as the BMI. In addition,  $x_{ij}$  and  $z_{ij}$  are dummy variables defined by

$$x_{ij} = \begin{cases} 2 & \text{if } G_{ij} = M_jM_j \\ 1 & \text{if } G_{ij} = M_jm_j \\ 0 & \text{if } G_{ij} = m_jm_j \end{cases} \quad \text{and} \quad z_{ij} = \begin{cases} -P_{m_j}^2 & \text{if } G_{ij} = M_jM_j \\ P_{m_j}P_{M_j} & \text{if } G_{ij} = M_jm_j \\ -P_{M_j}^2 & \text{if } G_{ij} = m_jm_j \end{cases}, \quad (\text{S.2})$$

and  $\alpha_j(t)$  and  $\delta_j(t)$  are regression coefficients of the dummy variables  $x_{ij}$  and  $z_{ij}$  at the time  $t$ .

In model (S.1),  $U_i(t)$  is the correlation effect among repeated measurements of both genetic and environmental factors of an individual,  $E_i$  is a random variation of subject  $i$ , and  $\epsilon_i$  is a random

measurement error term. Assume that  $U_i(t)$ ,  $E_i$ , and  $\epsilon_i$  are independent. Moreover, assume that  $E_i$  is normal  $N(0, \sigma_E^2)$  and  $\epsilon_i$  is normal  $N(0, \sigma_e^2)$ .

The above formulation is, of course, a general framework. In the context of population data, some of these components may be confounded. In addition, some of the components may need to be removed from the analysis. For instance, assume that the dominance effects are not significantly present. Then model (S.1) can be simplified to

$$y_i(t) = \mu(t) + w_i(t)\beta(t) + \sum_{j=1}^I x_{ij}\alpha_j(t) + U_i(t) + E_i + \epsilon_i. \quad (\text{S.3})$$

A similar character process model was developed by Pletcher and Geyer (1999) and Jafferzic and Pletcher (2000), which does not measure effects from specific genes and uses no marker information. The novel part of model (S.1) (or model (S.3)) is that we include measured genotype components estimating association with genotyped markers, i.e., the terms involves  $x_{ij}$  and  $z_{ij}$  (or  $x_{ij}$ ) [Fan and Jung, 2003; Fan et al., 2005; Fan and Xiong, 2002; Fan and Xiong, 2003; Jung et al., 2005]. Let the additive and dominance variance-covariance matrices of the indicator variables defined in (S.2) be

$$V_A = 2 \begin{pmatrix} P_{M_1}P_{m_1} & D_{M_1M_2} & \cdots & D_{M_1M_I} \\ D_{M_1M_2} & P_{M_2}P_{m_2} & \cdots & D_{M_2M_I} \\ \vdots & \vdots & \cdots & \vdots \\ D_{M_1M_I} & D_{M_2M_I} & \cdots & P_{M_I}P_{m_I} \end{pmatrix}, V_D = \begin{pmatrix} P_{M_1}^2P_{m_1}^2 & D_{M_1M_2}^2 & \cdots & D_{M_1M_I}^2 \\ D_{M_1M_2}^2 & P_{M_2}^2P_{m_2}^2 & \cdots & D_{M_2M_I}^2 \\ \vdots & \vdots & \cdots & \vdots \\ D_{M_1M_I}^2 & D_{M_2M_I}^2 & \cdots & P_{M_I}^2P_{m_I}^2 \end{pmatrix}. \quad (\text{S.4})$$

Such as equation (5) in Jung et al. [2005], the analytical formulas of parameter estimates of models (S.1) and (S.3) at the time  $t$  can be obtained as

$$\begin{pmatrix} \alpha_1(t) \\ \vdots \\ \alpha_I(t) \end{pmatrix} = V_A^{-1} \begin{pmatrix} 2D_{M_1Q} \\ \vdots \\ 2D_{M_IQ} \end{pmatrix} \alpha_Q(t) \quad \text{and} \quad \begin{pmatrix} \delta_1(t) \\ \vdots \\ \delta_I(t) \end{pmatrix} = V_D^{-1} \begin{pmatrix} D_{M_1Q}^2 \\ \vdots \\ D_{M_IQ}^2 \end{pmatrix} \delta_Q(t). \quad (\text{S.5})$$

From equations (S.5), it is clear that the parameters of LD (i.e.,  $D_{M_jQ}$  and  $D_{M_jM_k}$ ) and gene effects at the time  $t$  (i.e.,  $\alpha_Q(t)$  and  $\delta_Q(t)$ ) are contained in the mean coefficients. Hence, models (S.1) and (S.3) simultaneously take care of the LD and the effects of the putative trait locus  $Q$ . Moreover, the interaction between the genetic effects and time or age is modeled.

In the models (S.1) and (S.3), the markers  $M_j, j = 1, 2, \dots, I$ , are assumed to be located in a region of a single trait locus  $Q$ . This assumption can be removed, i.e., the markers can be from

different regions of one chromosome or even from different chromosomes. In one region, there can be one or more trait loci. Thus, the multiple trait loci jointly affect the phenotype. For most interest genetic traits, this is a realistic assumption. Similar arguments as above can be done to justify the models, but notations and formulations can be more complex and we don't provide the details in this article.

## Longitudinal Association Mapping Models Using Multi-allelic Markers

In a region of the QTL  $Q$ , suppose that multiple multi-allelic markers are typed, which may be micro-satellite markers. For simplicity, we use two marker  $A$  and  $B$  in our analysis, but the models and methods can be easily generalized to use multiple markers. Suppose that the markers  $A$  and  $B$  are in HWE. Let us denote the alleles of marker  $A$  by  $A_1, \dots, A_a$ , where  $a$  is the number of alleles. Let the frequency of  $A_i$  be  $P_{A_i}$ ,  $i = 1, 2, \dots, a$ . There are  $J_A = a(a+1)/2$  possible genotypes, which can be listed as  $A_1A_1, \dots, A_aA_a, A_1A_2, \dots, A_1A_a, \dots, A_{a-1}A_a$ . The marker  $B$  has  $b$  alleles denoted by  $B_1, \dots, B_b$ . Let the frequency of allele  $B_k$  be  $P_{B_k}$ ,  $k = 1, 2, \dots, b$ . There are  $J_B = b(b+1)/2$  possible genotypes, which can be listed as  $B_1B_1, \dots, B_bB_b, B_1B_2, \dots, B_1B_b, \dots, B_{b-1}B_b$ .

Again, consider a population sample with  $N$  individuals. For the  $i$ -th individual, let  $y_i$  be his/her quantitative trait value with genotype  $G_{A_i}$  at marker  $A$  and genotype  $G_{B_i}$  at marker  $B$ . Following Fan et al. [2006], consider the following "genotype effect model" under normality

$$\begin{aligned}
y_i(t) = & \mu(t) + w_i(t)\beta(t) + \sum_{j=1}^{a-1} x_{A_{ij}}\alpha_{A_j}(t) + \sum_{j=1}^{b-1} x_{B_{ij}}\alpha_{B_j}(t) \\
& + \sum_{1 \leq j < l \leq a} z_{A_{ijl}}\delta_{A_{jl}}(t) + \sum_{1 \leq j < l \leq b} z_{B_{ijl}}\delta_{B_{jl}}(t) + U_i(t) + E_i + e_i,
\end{aligned} \tag{S.6}$$

where the dummy variables  $x_{A_{ij}}$ ,  $z_{A_{ijl}}$ ,  $x_{B_{ij}}$  and  $z_{B_{ijl}}$  are defined by

$$\begin{aligned}
x_{A_{ij}} = & \begin{cases} 2 & \text{if } G_{A_i} = A_jA_j \\ 1 & \text{if } G_{A_i} = A_jA_l, l \neq j \\ 0 & \text{else} \end{cases}, \quad z_{A_{ijl}} = \begin{cases} -P_{A_l}^2 & \text{if } G_{A_i} = A_jA_j \\ P_{A_j}P_{A_l} & \text{if } G_{A_i} = A_jA_l, j \neq l \\ -P_{A_j}^2 & \text{if } G_{A_i} = A_lA_l \\ 0 & \text{else} \end{cases}, \\
x_{B_{ij}} = & \begin{cases} 2 & \text{if } G_{B_i} = B_jB_j \\ 1 & \text{if } G_{B_i} = B_jB_l, l \neq j \\ 0 & \text{else} \end{cases}, \quad z_{B_{ijl}} = \begin{cases} -P_{B_l}^2 & \text{if } G_{B_i} = B_jB_j \\ P_{B_j}P_{B_l} & \text{if } G_{B_i} = B_jB_l, j \neq l \\ -P_{B_j}^2 & \text{if } G_{B_i} = B_lB_l \\ 0 & \text{else} \end{cases},
\end{aligned} \tag{S.7}$$

and  $\alpha_{A_j}(t)$ ,  $\alpha_{B_j}(t)$ ,  $\delta_{A_{jl}}(t)$ ,  $\delta_{B_{jl}}(t)$  are regression coefficients of the dummy variables at the time  $t$ . The

other terms of model (S.6) are similar as those of model (S.1). Model (S.6) takes both additive and dominance effects into account [Fan et al., 2006]. Such as model (S.3), model (S.6) can be modified to an “additive effect model” if only the additive effect is modeled, i.e.,

$$y_i(t) = \mu(t) + w_i(t)\beta(t) + \sum_{j=1}^{a-1} x_{Aij}\alpha_{Aj}(t) + \sum_{j=1}^{b-1} x_{Bij}\alpha_{Bj}(t) + U_i(t) + E_i + e_i. \quad (\text{S.8})$$

In the following, we show that the parameters of LD and gene effects are contained in the regression coefficients. Models (S.6) and (S.8) take care of both the LD and the effects of the trait locus  $Q$ . They are valid temporal models to fit association between genetic markers and the trait.

Let  $x_{Aij}, x_{Bij}, z_{Aijl}$  and  $z_{Bijl}$  be the dummy variables defined by relations (S.7). Denote  $X_A = (x_{A11}, \dots, x_{A1(a-1)})^\tau$ ,  $X_B = (x_{B11}, \dots, x_{B1(b-1)})^\tau$ , and  $X_{AUB} = (X_A^\tau, X_B^\tau)^\tau$ . Let us denote the additive variance-covariance matrix of the dummy variables by  $V_A = \text{Cov}(X_{AUB}, X_{AUB}) = \text{E}(X_{AUB}X_{AUB}^\tau) - \text{E}X_{AUB}(\text{E}X_{AUB}^\tau)$ . Similarly, let  $Z_A = (z_{A112}, \dots, z_{A11a}, z_{A123}, \dots, z_{A12a}, \dots, z_{A1(a-1)a})^\tau$ ,  $Z_B = (z_{B112}, \dots, z_{B11b}, z_{B123}, \dots, z_{B12b}, \dots, z_{B1(b-1)b})^\tau$ , and  $Z_{AUB} = (Z_A^\tau, Z_B^\tau)^\tau$ . Let us denote the dominance variance-covariance matrix of the indicator variables  $z_{A1ij}, z_{B1kl}$  by  $V_D = \text{Cov}(Z_{AUB}, Z_{AUB})$ . For  $i = 1, 2, \dots, a$ , let us denote  $D_{A_iQ} = P(Q_1A_i) - q_1P_{A_i}$ , which are measures of LD between QTL  $Q$  and marker  $A$ . Here  $P(Q_1A_i)$  is the frequency of haplotype  $Q_1A_i$ . For  $k = 1, 2, \dots, b$ , let us denote  $D_{B_kQ} = P(Q_1B_k) - q_1P_{B_k}$ , which are measures of LD between QTL  $Q$  and marker  $B$ . Here  $P(Q_1B_i)$  is the frequency of haplotype  $Q_1B_i$ . For  $i = 1, 2, \dots, a, k = 1, \dots, b$ , let us denote  $D_{A_iB_k} = P(A_iB_k) - P_{A_i}P_{B_k}$ , which are measures of LD between markers  $A$  and  $B$ . Here  $P(A_iB_k)$  is frequency of haplotype  $A_iB_k$ .

Such as Appendix V, Fan et al. [2006], we can show that the regression coefficients of models (S.8) and (S.6) are given by

$$\begin{pmatrix} \alpha_{A1}(t) \\ \vdots \\ \alpha_{A(a-1)}(t) \\ \alpha_{B1}(t) \\ \vdots \\ \alpha_{B(b-1)}(t) \end{pmatrix} = (V_A/2)^{-1} \begin{pmatrix} D_{A_1Q} \\ \vdots \\ D_{A_{a-1}Q} \\ D_{B_1Q} \\ \vdots \\ D_{B_{b-1}Q} \end{pmatrix} \alpha_Q(t)$$

$$\begin{pmatrix} \delta_{A12}(t) \\ \vdots \\ \delta_{A(a-1)a}(t) \\ \delta_{B12}(t) \\ \vdots \\ \delta_{B(b-1)b}(t) \end{pmatrix} = V_D^{-1} \begin{pmatrix} [P_{A_2}D_{A_1Q} - P_{A_1}D_{A_2Q}]^2 \\ \vdots \\ [P_{A_{a-1}}D_{A_aQ} - P_{A_a}D_{A_{a-1}Q}]^2 \\ [P_{B_2}D_{B_1Q} - P_{B_1}D_{B_2Q}]^2 \\ \vdots \\ [P_{B_{b-1}}D_{B_bQ} - P_{B_b}D_{B_{b-1}Q}]^2 \end{pmatrix} \delta_Q(t). \quad (\text{S.9})$$

The elements of matrices  $V_A$  and  $V_D$  are provided in Appendix V, Fan et al. [2006]. Equations (S.9) show that the parameters of LD (i.e.,  $D_{A_iQ}$  and  $D_{B_kQ}$ ) and gene effects (i.e.,  $\alpha_Q(t)$  and  $\delta_Q(t)$ ) are contained in the regression coefficients. The gene substitution effect  $\alpha_Q(t)$  is contained only in  $\alpha_{A_j}, \alpha_{B_j}$ ; and the dominance effect  $\delta_Q(t)$  is contained only in  $\delta_{A_{jl}}(t), \delta_{B_{jl}}(t)$ . Thus,  $V_A$  is called additive variance-covariance matrix; and  $V_D$  is called dominance variance-covariance matrix. The model (S.6) orthogonally decomposes genetic effect into summation of additive and dominance effects.

### Analysis of FHS Data from GAW 13

For the trait of systolic blood pressure, Levy et al. (2000) performed a genome-wide linkage analysis of FHS data and identified a multi-allelic locus GATA25A04 (D17S1299) on chromosome 17 which shows strong linkage with a high LOD score 3.8. We concerned about the association between systolic blood pressure and genotypes of the locus GATA25A04 over people's age. At the locus GATA25A04, there are 8 alleles (184, 188, 192, 196, 200, 204, 208, 212). We investigated the temporal trend of systolic blood pressure related to genetic information, age, and sex. After a thorough model selection by fitting linear mixed model in R [Pinheiro and Bates, 2000], we got a final model as

$$y_{ij} = \mu_0 + t_{ij}\mu_{age} + t_{ij}^2\mu_{age^2} + t_{ij}^3\mu_{age^3} + \text{sex}_i\beta_{sex} + x_{i,188}\alpha_0 + x_{i,188}t_{ij}\alpha_{age} + x_{i,188}t_{ij}^2\alpha_{age^2} + x_{i,188}t_{ij}^3\alpha_{age^3} + U_i(t_{ij}) + E_i + e_{ij}, \quad (\text{S.10})$$

where  $x_{i,188} = \begin{cases} 2 & \text{if } G_i = 188/188 \\ 1 & \text{if } G_i = 188/* \\ 0 & \text{else} \end{cases}$  is the number of allele 188 in the genotype  $G_i$  of subject  $i$ , and  $*$  represents the alleles other than allele 188.

The variance estimations are  $\hat{\sigma}_E^2 = 11.21^2$  and  $\hat{\sigma}_S^2 = 12.82^2$ , and correlation range  $\hat{\rho} = 1.84$ . The regression results of model (S.10) are presented in Table S.1. In addition, we presented in Table S.1 the regression results of the following model

$$y_{ij} = \mu_0 + t_{ij}\mu_{age} + t_{ij}^2\mu_{age^2} + t_{ij}^3\mu_{age^3} + \text{sex}_i\beta_{sex} + x_{i,188}\alpha_0 + U_i(t_{ij}) + E_i + e_{ij}, \quad (\text{S.11})$$

which does not include the time-dependent variables  $x_{i,188}t_{ij}$ ,  $x_{i,188}t_{ij}^2$ , and  $x_{i,188}t_{ij}^3$ . From the results of model (S.11) in Table S.1, we can see that allele 188 has no significant effect on the SBP since the high p-value 0.28. However, all three time-dependent variables  $x_{i,188}t_{ij}$ ,  $x_{i,188}t_{ij}^2$ , and  $x_{i,188}t_{ij}^3$  have significant effects on SBP at a significance level 0.05 for model (S.10). Therefore, it is important to include the time-dependent genetic variables in the analysis. Ignoring time trends in genetic effects can make the model invalid.

To understand the temporal trend of SBP, Figure S.1 provides the predicted SBP vs age for male and female, separately. The predicted SBP of male is 4.95 higher than that of female. Interestingly, the allele 188 at locus GATA25A04 almost has no effect on SBP for age interval of (25, 40). However, it does have positive effect for SBP when one's age is older than 40. The allele 188 at locus GATA25A04 can be a risk genetic variant since it may lead to higher SBP for middle aged and old people.

In models (S.10) and (S.11), we do not include the random spline variables  $u_k$  and  $v_k$  as these of spline models (8) and (9) in the main text. We did fit the models by using spline models (8) and (9), but none of them significantly improves the fitting. Hence, none of them is included in the final model. We also fitted non-parametric linear penalized spline models, but they failed to detect the genetic effect of allele 188 although the random term  $\sum_{k=1}^K u_k(t_{ij} - \kappa_k)_+$  provides significant result.

Table S.1: Association results of blood systolic pressure and marker GATA25A04 (D17S1299) for Framingham Heart Study Data, Genetic Analysis Workshop 13.

| Model                                                                                                                                                                    | Coefficient      | Estimates | Std Error | t-value | P-value  |
|--------------------------------------------------------------------------------------------------------------------------------------------------------------------------|------------------|-----------|-----------|---------|----------|
| Model<br>(S.10)                                                                                                                                                          | $\mu_0$          | 130.12519 | 0.5845056 | 222.62  | < 0.0001 |
|                                                                                                                                                                          | $\mu_{age}$      | 0.58538   | 0.0205328 | 28.51   | < 0.0001 |
|                                                                                                                                                                          | $\mu_{age^2}$    | 0.00312   | 0.0007050 | 4.43    | < 0.0001 |
|                                                                                                                                                                          | $\mu_{age^3}$    | -0.00015  | 0.0000312 | -4.96   | < 0.0001 |
|                                                                                                                                                                          | $\beta_{sex}$    | -4.95030  | 0.7489797 | -6.61   | < 0.0001 |
|                                                                                                                                                                          | $\alpha_0$       | 2.56019   | 1.4748975 | 1.74    | 0.08     |
|                                                                                                                                                                          | $\alpha_{age}$   | 0.15237   | 0.0665988 | 2.29    | 0.02     |
|                                                                                                                                                                          | $\alpha_{age^2}$ | -0.00418  | 0.0021415 | -1.95   | 0.05     |
|                                                                                                                                                                          | $\alpha_{age^3}$ | -0.00023  | 0.0000944 | -2.45   | 0.01     |
| Model<br>(S.11)                                                                                                                                                          | $\mu_0$          | 130.21348 | 0.5829787 | 223.36  | < 0.0001 |
|                                                                                                                                                                          | $\mu_{age}$      | 0.59855   | 0.0197430 | 30.32   | < 0.0001 |
|                                                                                                                                                                          | $\mu_{age^2}$    | 0.00273   | 0.0006753 | 4.04    | 0.0001   |
|                                                                                                                                                                          | $\mu_{age^3}$    | -0.00018  | 0.0000297 | -5.97   | < 0.0001 |
|                                                                                                                                                                          | $\beta_{sex}$    | -4.94591  | 0.7488726 | -6.60   | < 0.0001 |
|                                                                                                                                                                          | $\alpha_0$       | 1.44832   | 1.3486853 | 1.07    | 0.28     |
| The overall likelihood ratio test of model (S.10) vs. model (S.11) to test $H_0 : \alpha_{age} = \alpha_{age^2} = \alpha_{age^3} = 0$ is 9.09, df = 3, p-value = 0.0281. |                  |           |           |         |          |

**(a) Predicted Systolic Blood Pressure Vs. Age for Male**

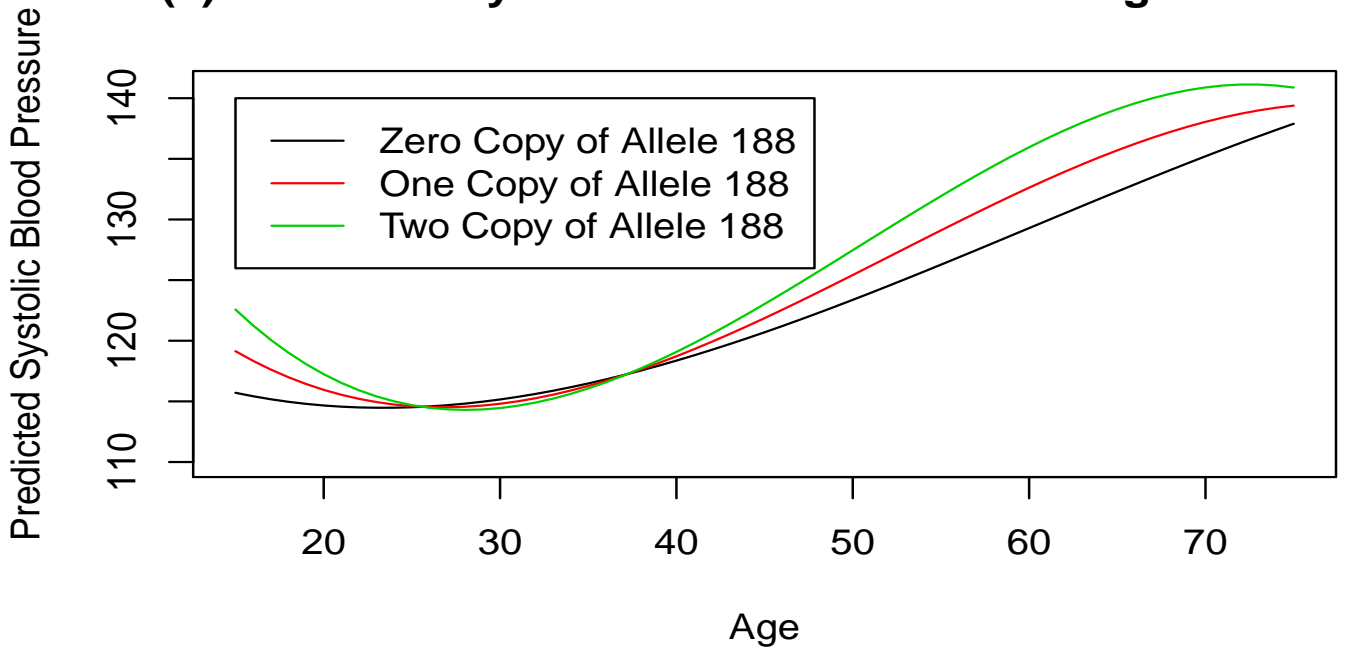

**(b) Predicted Systolic Blood Pressure Vs. Age for Female**

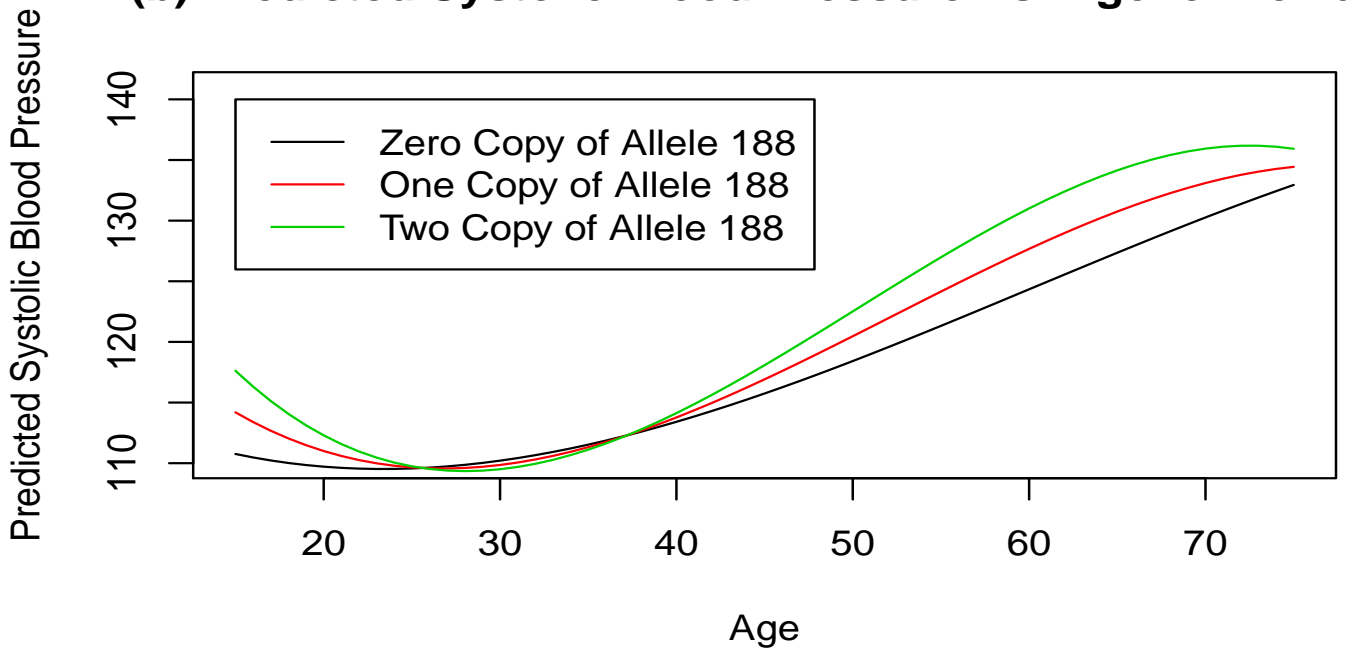

Figure S.1: Predicted systolic blood pressure against age in years for Male and Female by marker GATA25A04 (D17S1299) and sex, based on parametric model (S.10).
